# Supplementary material for: Resistance related metabolic pathways for drug target identification in Mycobacterium tuberculosis
Source: PubMed Central journal article supplement (PMC4745158; doi:10.1186/s12859-016-0898-8), 2016-02-08
Supplement: 12859_2016_898_MOESM6_ESM.pdf [file 12859_2016_898_MOESM6_ESM.pdf]

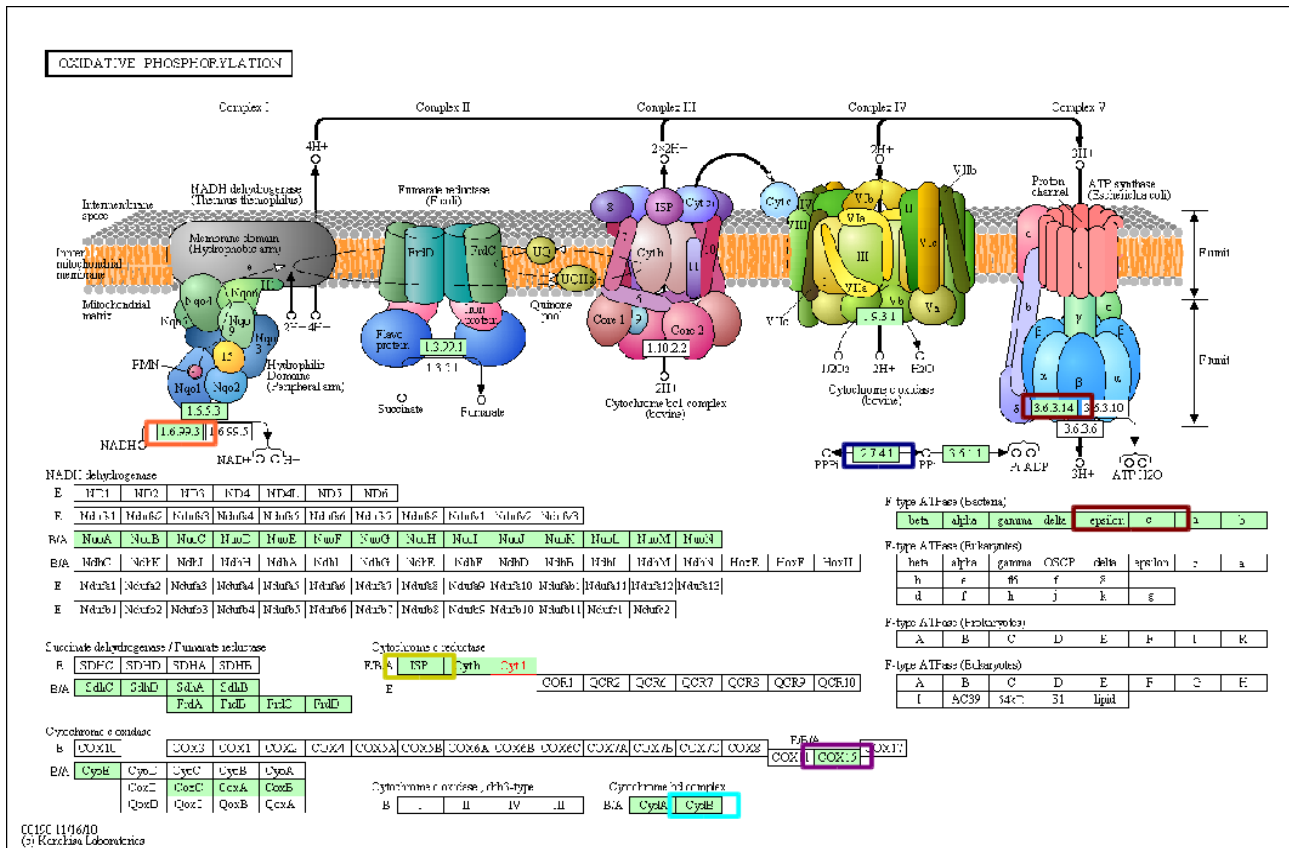

**Figure S2: KEGG metabolic pathway map for Energy metabolism (oxidative phosphorylation) in *M. tuberculosis* H37rV strain.**

Rv2984 or *ppk* drug target candidate is shown in blue highlighted box and involved in step 2.7.4.1 of this specific pathway. Rv2194 or *qcrC* drug target candidate is shown in the red highlighted box. Both drug target candidates Rv1305 (*atpE*) and Rv1311 (*atpC*) are shown in brown highlighted box and involved in step 3.6.3.14 of this specific pathway. The proposed drug target Rv2195 or *qcrA* is shown in the yellow highlighted box and involved in cytochrome C reductase. Drug candidates Rv1456c or COX15 is shown in the magenta highlighted box involved in cytochrome C oxidase and Rv1622c or *CydB* is shown in the light blue highlighted box involved in ubiquinol-cytochrome oxidase. Known drug resistance gene Rv1854c or *ndh* is shown in orange highlighted box and involved in step 1.6.99.3 of this pathway. *M. tuberculosis* specific genes are coloured in green.
