# Supplementary material for: Resistance related metabolic pathways for drug target identification in Mycobacterium tuberculosis
Source: PubMed Central journal article supplement (PMC4745158; doi:10.1186/s12859-016-0898-8), 2016-02-08
Supplement: 12859_2016_898_MOESM7_ESM.pdf [file 12859_2016_898_MOESM7_ESM.pdf]

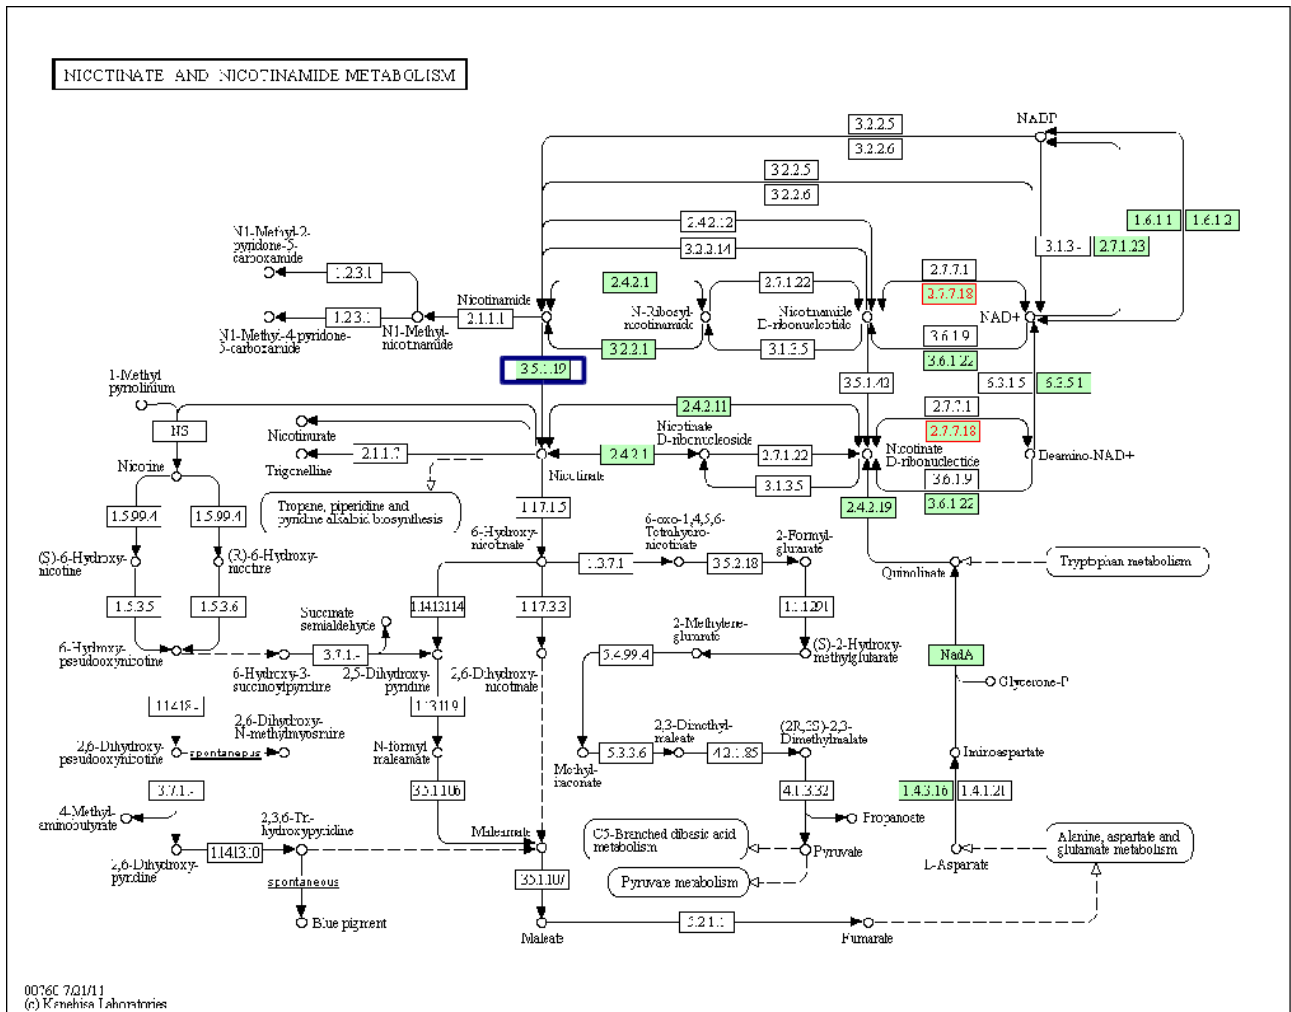

**Figure S3: KEGG metabolic pathway map for Nicotinate and Nicotinamide metabolism in *M. tuberculosis* H37rV strain.**

Rv2421c or *nadD* drug target candidate is shown in red highlighted box and involved in step 2.7.7.18 of this specific pathway. Known drug resistance gene Rv2043c or *pncA* is shown in blue highlighted box and involved in step 3.5.1.19 of this pathway. *M. tuberculosis* specific genes are coloured in green.
