# Supplementary material for: Resistance related metabolic pathways for drug target identification in Mycobacterium tuberculosis
Source: PubMed Central journal article supplement (PMC4745158; doi:10.1186/s12859-016-0898-8), 2016-02-08
Supplement: 12859_2016_898_MOESM9_ESM.pdf [file 12859_2016_898_MOESM9_ESM.pdf]

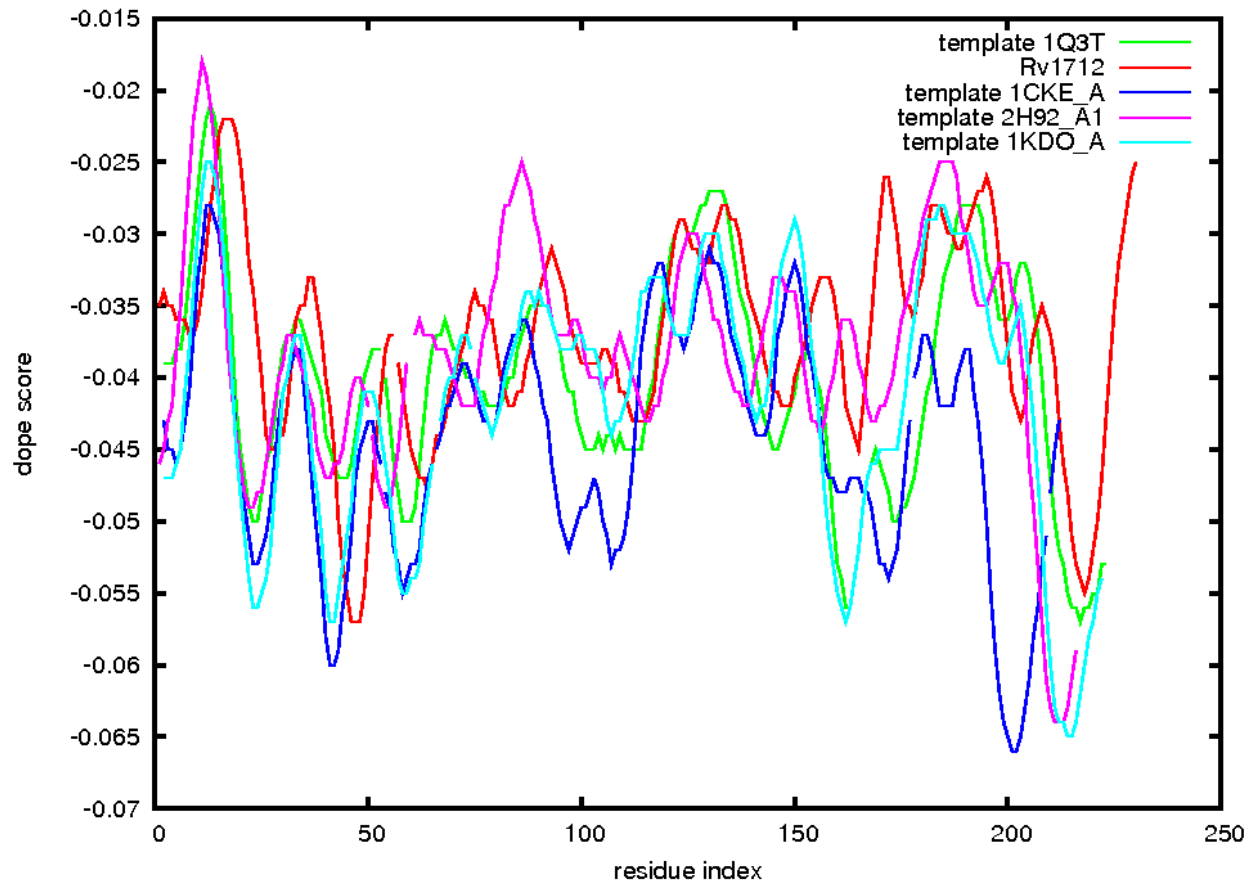

**Figure S4 - DOPE score energy profiles graph of the structural model for Rv1712 (red) and templates 1Q3T (green), 1CKE (dark blue), 1KDO (light blue) and 2H92 (purple).**  
Generated using Gnuplotv4.2 [41].
