# Supplementary material for: Resistance related metabolic pathways for drug target identification in Mycobacterium tuberculosis
Source: PubMed Central journal article supplement (PMC4745158; doi:10.1186/s12859-016-0898-8), 2016-02-08
Supplement: 12859_2016_898_MOESM11_ESM.pdf [file 12859_2016_898_MOESM11_ESM.pdf]

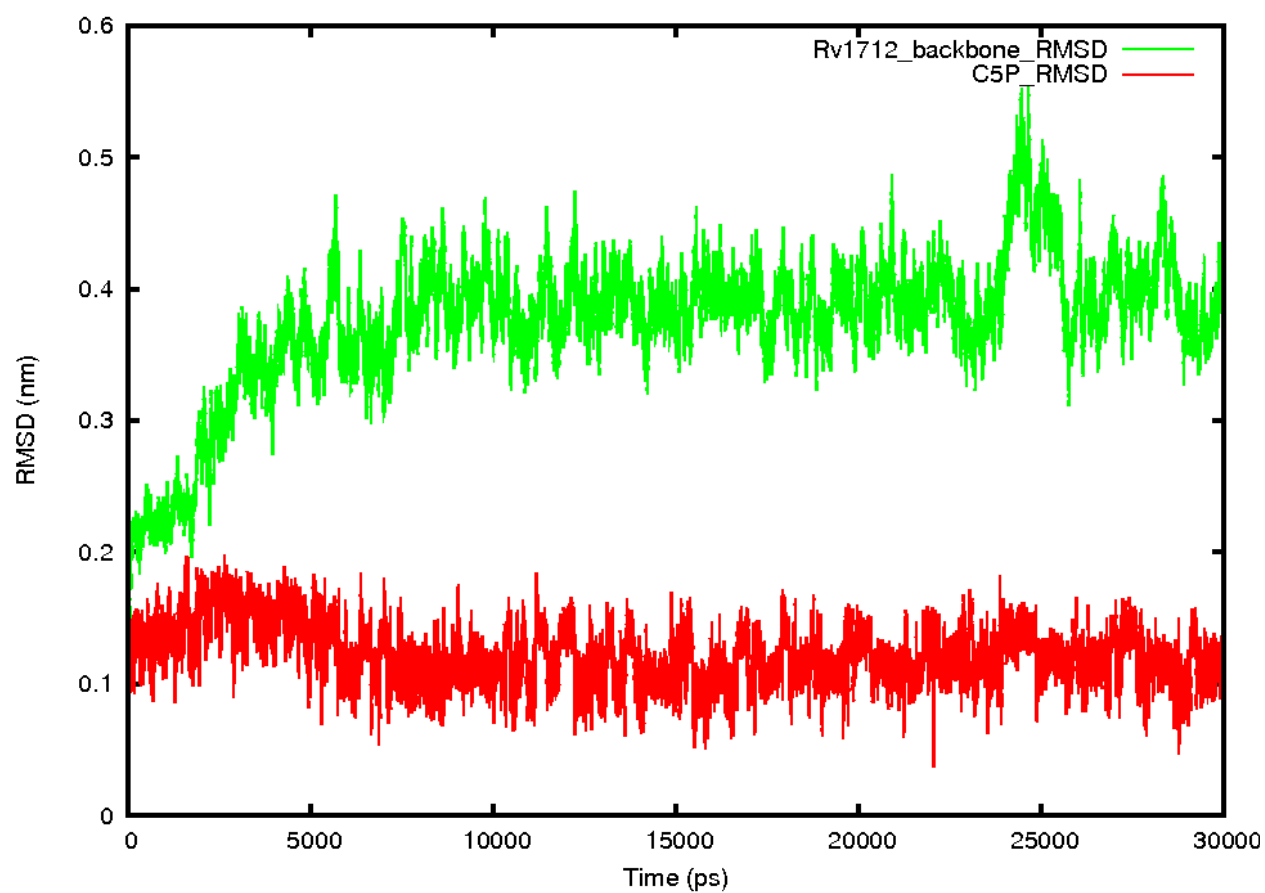

**Figure S6 – RMSD of the backbone atoms of model for Rv1712 (green) and substrate C5P (red) during the 30000ps simulation.**  
Generated using Gnuplotv4.2 [41].
