# Supplementary material for: Resistance related metabolic pathways for drug target identification in Mycobacterium tuberculosis
Source: PubMed Central journal article supplement (PMC4745158; doi:10.1186/s12859-016-0898-8), 2016-02-08
Supplement: 12859_2016_898_MOESM12_ESM.pdf [file 12859_2016_898_MOESM12_ESM.pdf]

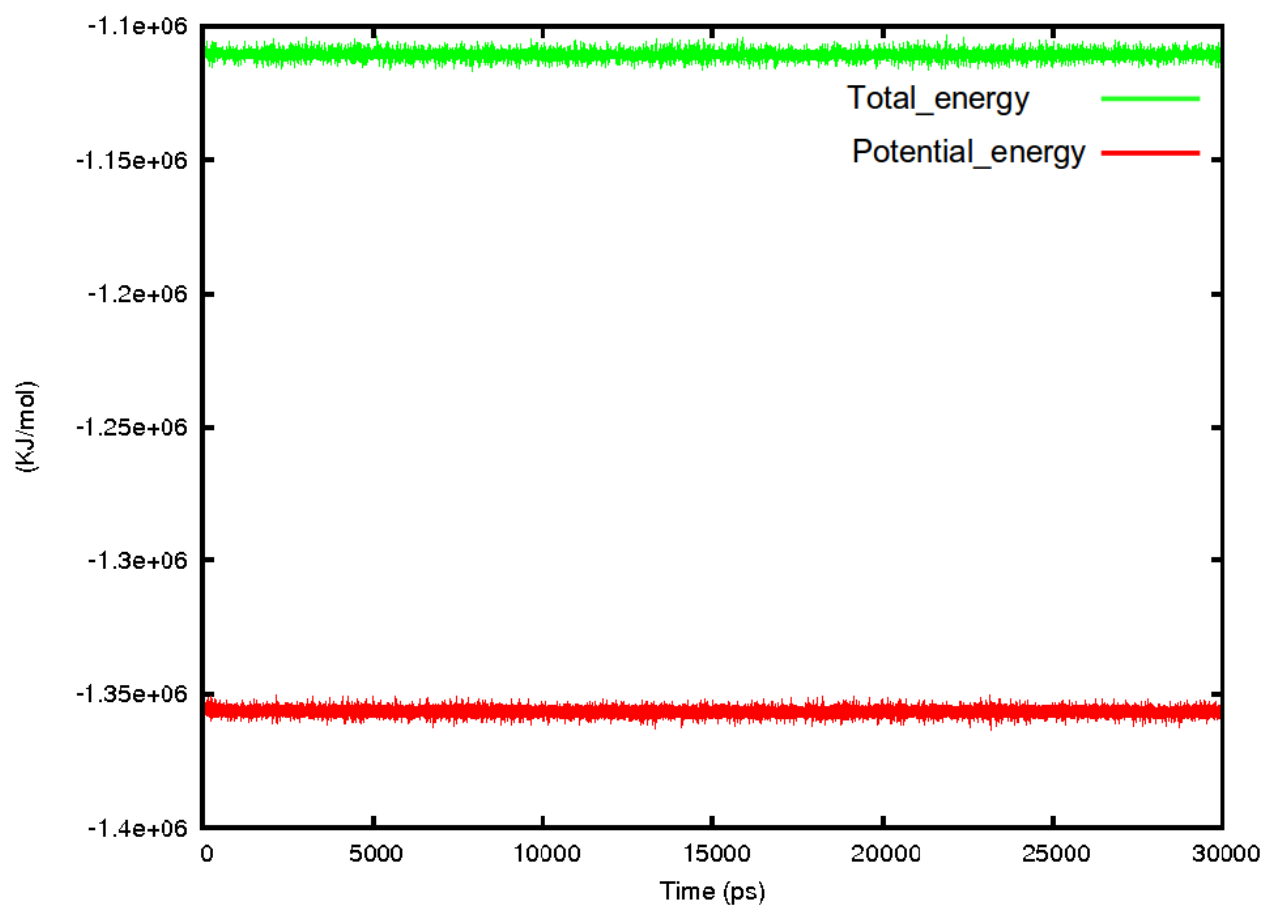

**Figure S7 – The variation in total (green) and potential energy (red) for the Rv1712-C5P complex during the 30000ps simulation.**  
Generated using Gnuplotv4.2 [41].
