# Supplementary material for: Resistance related metabolic pathways for drug target identification in Mycobacterium tuberculosis
Source: PubMed Central journal article supplement (PMC4745158; doi:10.1186/s12859-016-0898-8), 2016-02-08
Supplement: 12859_2016_898_MOESM13_ESM.pdf [file 12859_2016_898_MOESM13_ESM.pdf]

## RMS fluctuation

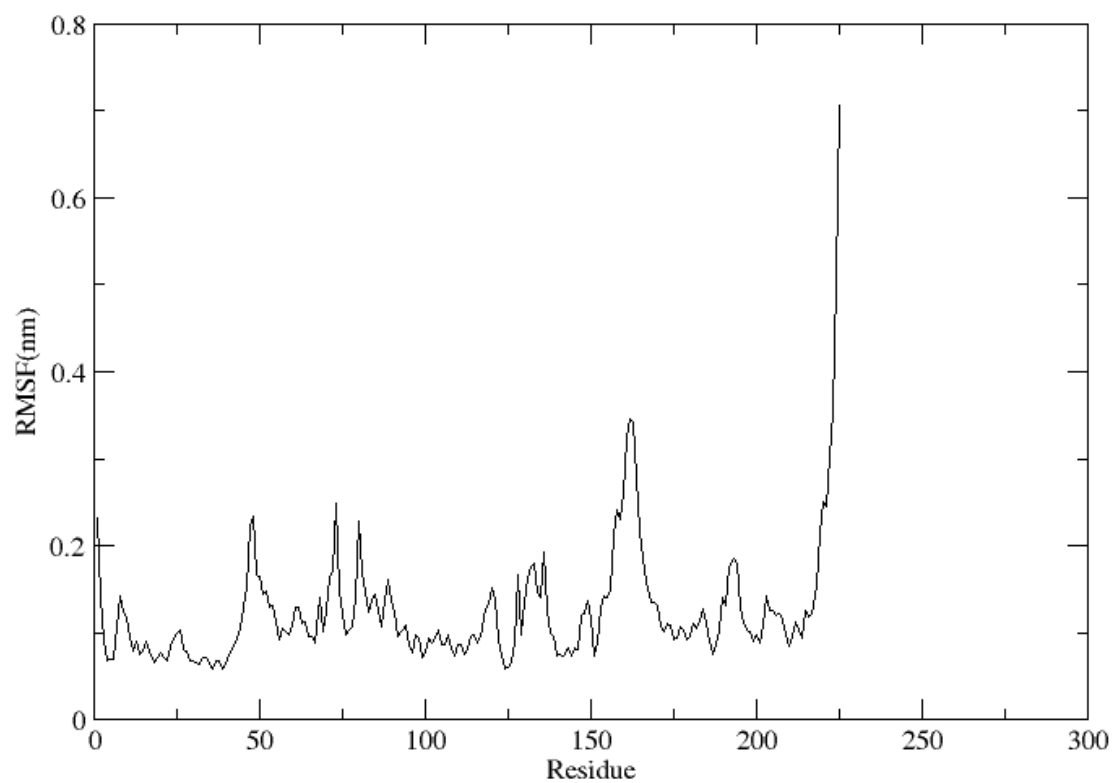

**Figure S8 – RMS fluctuations of all C $\alpha$  residues for the Rv1712 over the 30000ps simulation.**
